# Supplementary material for: Tailoring sensing behavior of Cu@multi-wall carbon nanotubes/polydimethylsiloxane strain sensors through surface Cu geometrical structures
Source: Royal Society of Chemistry journal article supplement (doi:10.1039/d0tc00238k), 2020-01-01
Supplement: d0tc00238k1.pdf [file d0tc00238k1.pdf]

**Supporting Information for**

**Tailoring sensing behavior of Cu@multi-wall carbon  
nanotubes/polydimethylsiloxane strain sensor through  
surface Cu geometrical structure**

Yao-Yao Bai<sup>a</sup>, Bin Zhang<sup>a,\*</sup>, Zhe-Xuan Wang<sup>a</sup>, Yujia Yang<sup>a</sup>, Xu-Ping Wu<sup>b,c</sup>, Guang-  
Ping Zhang<sup>b,\*</sup>

<sup>a</sup> *Key Laboratory for Anisotropy and Texture of Materials, Ministry of Education,  
School of Materials Science and Engineering, Northeastern University, 3-11 Wenhua  
Road, Shenyang 110819, P. R. China*

<sup>b</sup> *Shenyang National Laboratory for Materials Science, Institute of Metal Research,  
Chinese Academy of Sciences, 72 Wenhua Road, Shenyang 110016, P. R. China*

<sup>c</sup> *School of Materials Science and Engineering, University of Science and Technology  
of China, Shenyang 110016, P. R. China*

*\*To whom correspondence should be addressed: zhangb@atm.neu.edu.cn*

*gpzhang@imr.ac.cn*

Three MWCNT films with different thicknesses were fabricated from three aqueous solutions with monodisperse MWCNTs via vacuum filtration. The compositions of the solutions are listed in Table S1. The solutions were prepared by adding MWCNTs and Triton X-100 in 1000 ml deionized water, and 10-minute sonicating (using Q700, sonicator Co. Ltd., USA) for 3 times under a power of 100 Watt. After each 10 minute sonication, the MWCNT solution was centrifuged for 30 min at a centrifuge speed of 6000 r/min. Then the film was prepared by filtering the monodisperse MWCNT solution through a 0.45  $\mu\text{m}$ -thick cellulose filter using a vacuum-pump. At last, the as-filtered MWCNT films with different thicknesses were rinsed using deionized water to wash away the surfactant, Triton X-100, and dried at 80°C for 4 hours.

Table S1. Compositions of MWCNT aqueous solutions and thicknesses of MWCNT films

| Sample | MWCNTs (mg) | Triton X-100 (mL) | DI water (mL) | Thickness ( $\mu\text{m}$ ) |
|--------|-------------|-------------------|---------------|-----------------------------|
| 1      | 500         | 5                 | 1000          | 30                          |
| 2      | 750         | 10                | 1000          | 60                          |
| 3      | 1000        | 15                | 1000          | 80                          |

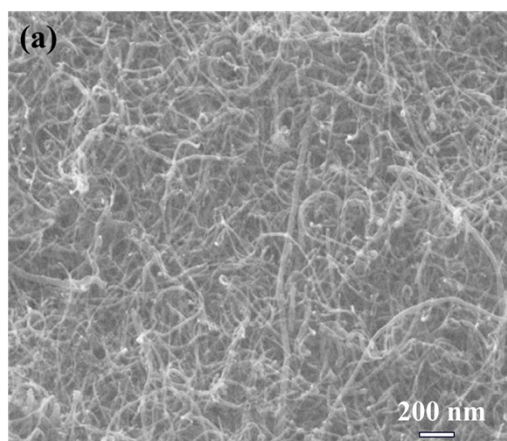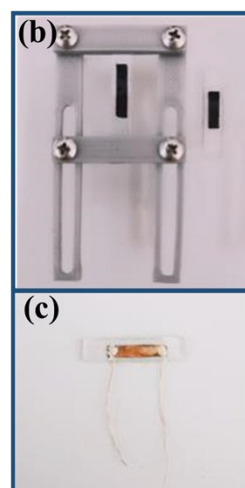

**Fig. S1.** (a) SEM image of as-prepared MWCNT film; Optical images of (b) stretched MP substrate and (c) as-fabricated Cu@MP strain sensor

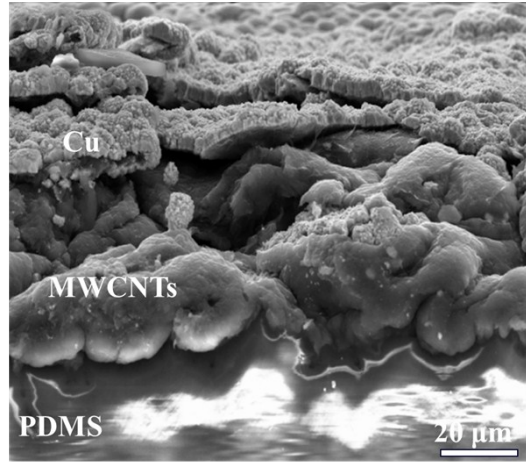

**Fig. S2.** Cross-sectional SEM image of Cu@MP hybrid film fabricated on 30% pre-strain substrate

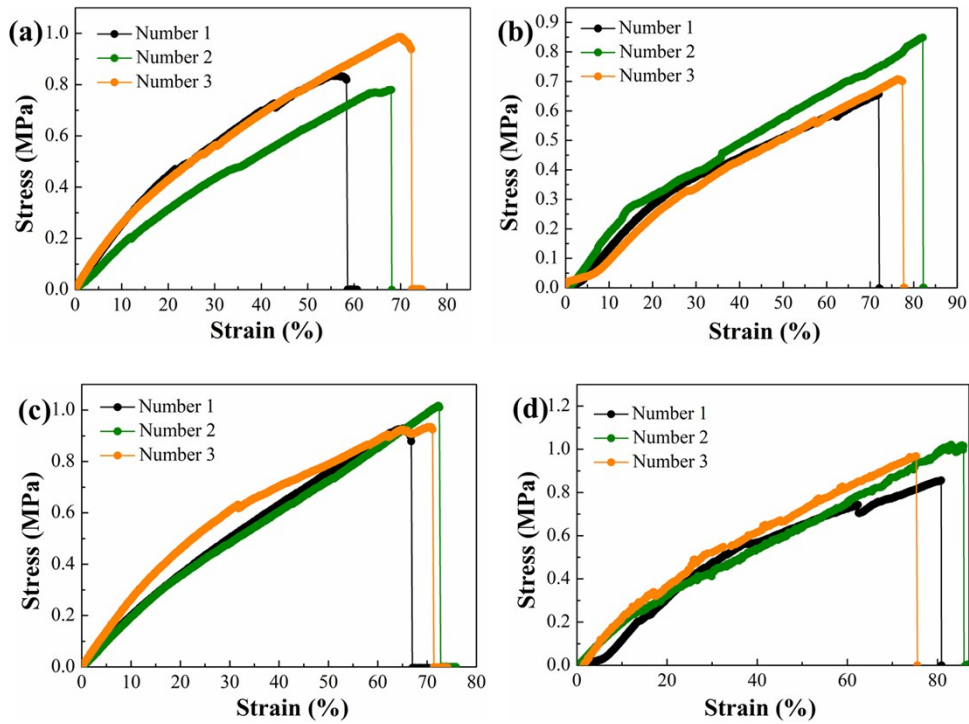

**Fig. S3.** Stress-strain curves of (a) MP, (b) 10%, (c) 20%, and (d) 30% pre-strain Cu@MP sensors,

respectively

**Table S2.** Ultimate tensile stress and fracture strain of MP and pre-strain Cu@MP sensors

| Sensors        | Ultimate tensile stress (MPa) | fracture strain (%) |
|----------------|-------------------------------|---------------------|
| MP             | $0.84 \pm 0.12$               | $66 \pm 8$          |
| 10% pre-strain | $0.74 \pm 0.11$               | $77 \pm 5$          |
| 20% pre-strain | $0.94 \pm 0.06$               | $70 \pm 4$          |
| 30% pre-strain | $0.94 \pm 0.09$               | $80 \pm 5$          |

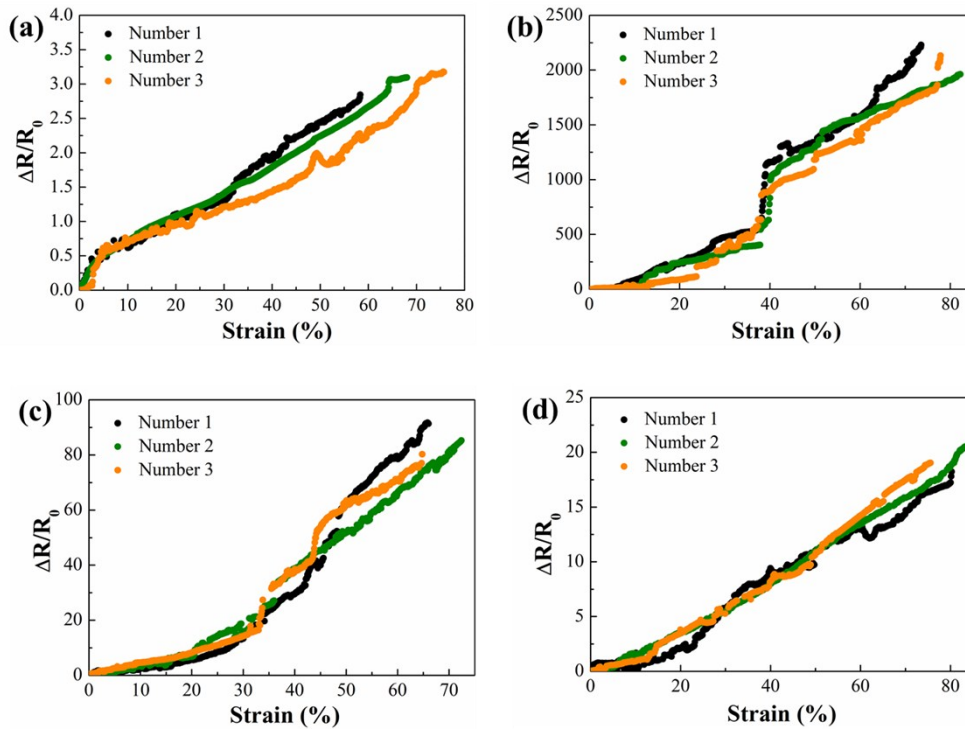

**Fig. S4.** Relative change in resistance as a function of strain for sensors of (a) MP, (b) 10%, (c) 20%, and (d) 30% pre-strain Cu@MP, respectively

**Table S3.**  $\Delta R/R_0$  at different tensile strains for MP and corresponding pre-strain Cu@MP sensors

| Tensile strain | MP sensors      | 10% pre-strain sensors | 20% pre-strain sensors | 30% pre-strain sensors |
|----------------|-----------------|------------------------|------------------------|------------------------|
| 10%            | $0.67 \pm 0.06$ | $21.68 \pm 4.66$       | $3.65 \pm 0.92$        | $1.32 \pm 0.72$        |
| 30%            | $1.30 \pm 0.11$ | $401.19 \pm 72.12$     | $14.79 \pm 1.17$       | $5.66 \pm 0.28$        |
| 50%            | $2.19 \pm 0.26$ | $1277.20 \pm 62.90$    | $59.21 \pm 7.46$       | $10.96 \pm 0.12$       |
| 70%            | $2.98 \pm 0.31$ | $1816.92 \pm 183$      | $86.98 \pm 4.32$       | $16.20 \pm 1.51$       |

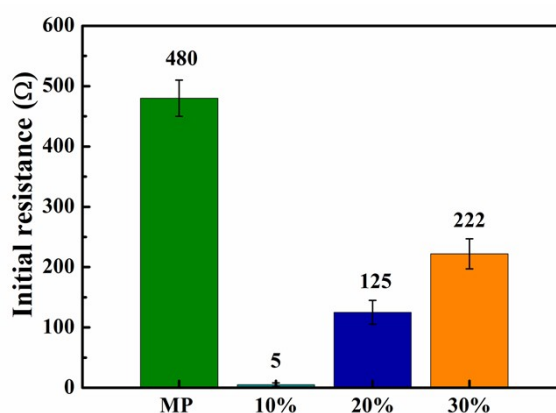**Fig. S5.** Initial resistance of MP and corresponding pre-strain Cu@MP sensors

Element EDS mapping of C, Si and Cu which are the tracing elements of the MWCNTs, the PDMS and the Cu film of a sensor, respectively. An SEM image of a failed 10% pre-strain Cu@MP sensor with a large crack is shown in Fig. S6(a), and the corresponding element mapping are shown in Fig. S6(c), (d) and (e), respectively. The strong signals of all the three element mapping shown in Fig. S6(b) indicates the constitute of the sensor. The strong C and Si mapping (in red and blue, respectively) appeared at the large crack are correlated with MWCNTs and PDMS, respectively, proving the MWCNTs embedded in PDMS as aforementioned, and the continuous conductive network of MWCNTs still persisted when the Cu film fractured.

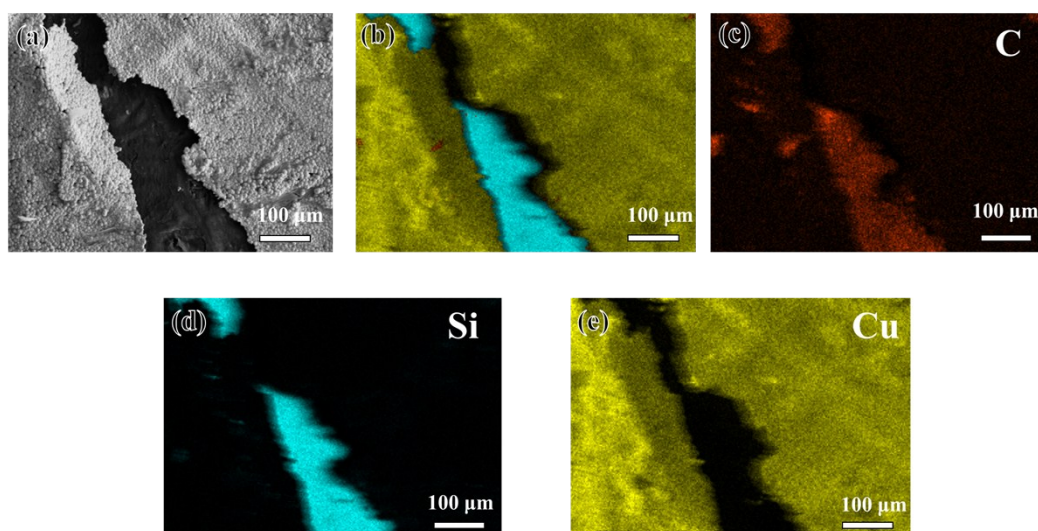

**Fig. S6.** (a) SEM image and (b-e) element mapping of 10% pre-strain Cu@MP sensor in Stage 3

**Table S4.** Parameter comparison of different strain sensors

| Material                               | GF range        | Strain range (%) | Ref.                |
|----------------------------------------|-----------------|------------------|---------------------|
| <b>Ti3C2Tx MXene/Carbon Nanotube</b>   | 64.6-772.6      | 0-130            | 1                   |
| <b>RGO/TPU</b>                         | 11-79           | 0-100            | 2                   |
| <b>Graphene armour scales</b>          | 200-1054        | 0-26             | 3                   |
| <b>GNC/PDMS</b>                        | 87-1071         | 0-15             | 4                   |
| <b>Ti3C2Tx MXene- Graphene</b>         | 190.8-1148.2    | 0-74.1           | 5                   |
| <b>Crack-based Ni@Graphene Wrapped</b> | 36.03-3360.     | 0-65             | 6                   |
| <b>Polyurethane Sponge</b>             |                 |                  |                     |
| <b>Aligned fiber based CPCs</b>        | 50-593          | 0-150            | 7                   |
| <b>RGO/PDMS</b>                        | 7-173           | 0-40             | 8                   |
| <b>Wrinkled Platinum Sensor</b>        | 0-42            | 0-185            | 9                   |
| <b>Fish Scale-Like Graphene</b>        | 16.2-150        | 0-82             | 10                  |
| <b>10% pre-strain Cu@MP Sensor</b>     | <b>263-2387</b> | <b>0-82</b>      | <b>Present work</b> |

## Reference

1. Y. Cai, J. Shen, G. Ge, Y. Zhang, W. Jin, W. Huang, J. Shao, J. Yang and X. Dong, *ACS Nano*, 2018, **12**, 56-62.
2. Y. Wang, J. Hao, Z. Huang, G. Zheng, K. Dai, C. Liu and C. Shen, *Carbon*, 2018, **126**, 360-371.
3. Y. F. Yang, L. Q. Tao, Y. Pang, H. Tian, Z. Y. Ju, X. M. Wu, Y. Yang and T. L. Ren, *Nanoscale*, 2018, **10**, 11524-11530.
4. P. Xue, C. Chen and D. Diao, *Carbon*, 2019, **147**, 227-235.
5. Y. Yang, Z. Cao, P. He, L. Shi, G. Ding, R. Wang and J. Sun, *Nano Energy*, 2019, **66**, 104134.
6. F. Han, J. Li, S. Zhao, Y. Zhang, W. Huang, G. Zhang, R. Sun and C.-P. Wong, *J. Mater. Chem. C*, 2017, **5**, 10167-10175.
7. G. Li, K. Dai, M. Ren, Y. Wang, G. Zheng, C. Liu and C. Shen, *Journal of Materials Chemistry C*, 2018, **6**, 6575-6583.
8. Y. J. Yun, J. Ju, J. H. Lee, S.-H. Moon, S.-J. Park, Y. H. Kim, W. G. Hong, D. H. Ha, H. Jang, G. H. Lee, H.-M. Chung, J. Choi, S. W. Nam, S.-H. Lee and Y. Jun, *Advanced Functional Materials*, 2017, **27**, 1701513.
9. J. D. Pegan, J. Zhang, M. Chu, T. Nguyen, S. J. Park, A. Paul, J. Kim, M. Bachman and M. Khine, *Nanoscale*, 2016, **8**, 17295-17303.
10. Q. Liu, J. Chen, Y. Li and G. Shi, *ACS Nano*, 2016, **10**, 7901-7906.
